# Supplementary material for: Reply to the ‘Comment on “The association between carotenoids and subjects with overweight or obesity: a systematic review and meta-analysis”’ by N. Shokri-mashhadi and S. Saadat, Food Funct., 2021, 12, DOI: 10.1039/D1FO01617B
Source: Royal Society of Chemistry journal article supplement (doi:10.1039/d1fo02621f), 2021-12-15
Supplement: d1fo02621f1.pdf [file d1fo02621f1.pdf]

Table S1 The basic information and reasons of exclusion of some literature

| Author           | Publish time | Study type    | Population                                                        | Intervention                                                       | Reasons of exclusion                                                                                                          |
|------------------|--------------|---------------|-------------------------------------------------------------------|--------------------------------------------------------------------|-------------------------------------------------------------------------------------------------------------------------------|
| Mashhadi et al.  | 2018         | RCT           | Participants with type 2 diabetes                                 | Astaxanthin                                                        | 1. Not possible to identify whether the study subjects were overweight or obese.<br>2. Study subjects with metabolic diseases |
| Mikami et al.    | 2017         | RCT           | Japanese adult men and women with BMI $\geq 22$ kg/m <sup>2</sup> | Fucoxanthin                                                        | Not all study participants were overweight or obese.                                                                          |
| Markovits et al. | 2009         | RCT           | Obese patients and a control group                                | A mixture of lycopene, tocopherols, phytoene and phytofluene, etc. | A mixture of carotenoids and other antioxidants                                                                               |
| Iwamoto et al.   | 2012         | One-arm trial | Postmenopausal obese women                                        | A beverage containing $\beta$ -cryptoxanthin, vitamin C, etc       | 1. One-arm trial;<br>2. A mixture of carotenoids and other antioxidants;                                                      |

**RCT:** Randomized Controlled Trial; **BMI:** Body Mass Index; **LCD:** Low Calorie Diet

Table S1 The basic information and reasons of exclusion of some literature(continued)

| Author            | Publish time | Study type | Population                                                       | Intervention                                            | Reasons of exclusion                                                                                                                     |
|-------------------|--------------|------------|------------------------------------------------------------------|---------------------------------------------------------|------------------------------------------------------------------------------------------------------------------------------------------|
| McEneny et al.    | 2013         | RCT        | Men and women with a BMI between 18.5 and 35 kg/m <sup>2</sup> . | Lycopene-rich diet and lycopene supplement              | 1.Not all study participants were overweight or obese;<br>2.Pre and post intervention weight data not available                          |
| Xu et al.         | 2013         | RCT        | Atherosclerosis patients                                         | Lutein                                                  | Not possible to identify whether the study subjects were overweight or obese.                                                            |
| Nouri et al.      | 2020 Apr.    | RCT        | Infertile men with oligozoospermia                               | Lycopene                                                | 1.Not possible to identify whether the study subjects were overweight or obese;<br>2.Pre and post intervention weight data not available |
| C. L. Shen et al. | 2018         | RCT        | Postmenopausal women                                             | Tocotrienol                                             | 1.Interventions do not contain carotenoids<br>2. Not possible to identify whether the study subjects were overweight or obese;           |
| Stonehouse et al. | 2016         | RCT        | Type 2 diabetes patients with 20–45 kg/m <sup>2</sup>            | TRF-80 (tocotrienol + tocopherol),<br>CC-60 (carotenes) | 1.Not possible to identify whether the study subjects were overweight or obese;<br>2. Subjects with metabolic diseases                   |

**RCT:** Randomized Controlled Trial; **BMI:** Body Mass Index; **LCD:** Low Calorie Diet

Table S1 The basic information and reasons of exclusion of some literature(continued)

| Author                          | Publish time | Study type       | Population                                                                      | Intervention                           | Reasons of exclusion                                                                                                                                                                          |
|---------------------------------|--------------|------------------|---------------------------------------------------------------------------------|----------------------------------------|-----------------------------------------------------------------------------------------------------------------------------------------------------------------------------------------------|
| Beynon et al.                   | 2019         | RCT              | Men with raised PSA levels<br>(but prostate cancer-free)                        | Lycopene and green tea<br>intervention | Pre and post intervention weight data not available                                                                                                                                           |
| Hajizadeh-<br>Sharafabad et al. | 2020 Dec.    | RCT              | Healthy men and<br>postmenopausal women<br>(BMI= 30-45 kg/m <sup>2</sup> )      | Lutein with LCD                        | 1.Mixture of carotenoids and other slimming substances;<br>2. Pre and post intervention weight data not available<br>3. Exceeding time limits (we searched databases up to<br>September 2020) |
| Nishimura et al.                | 2019         | RCT              | Healthy Japanese subjects<br>with low-density lipoprotein<br>cholesterol levels | Lycopene                               | 1.Not possible to identify whether the study subjects<br>were overweight or obese;<br>2.Pre and post intervention weight data not available;                                                  |
| N. E. Chalyk et al.             | 2017         | One-arm<br>trial | Healthy volunteer with<br>normal and excess weight                              | Astaxanthin                            | 1.Not all study participants were overweight or obese;<br>2.Pre and post intervention weight data not available;<br>3. One-arm trial                                                          |

**RCT:** Randomized Controlled Trial; **BMI:** Body Mass Index; **LCD:** Low Calorie Diet
